# Supplementary material
Source: publisher figshare collection journal article supplement (https://tandf.figshare.com/articles/dataset/_/12853416)
Supplement: Supplementary file 1 [file 1]

| **Table S3.** Final epitopes and their restricted HLA* | | | | | |
| --- | --- | --- | --- | --- | --- |
| **Antigen** | **Consensus Number** | **Selected class II epitope** | **HLA-II** | **Internal class I epitope** | **HLA-I** |
| **FimA** | 1 | KIKTLAMIVVSALSL | HLA-DRB1*07:01 | LAMIVVSAL | HLA-A*02:01 |
| **HLA-DRB1*15:01** | HLA-A*24:02 |
| HLA-DRB4*01:01 | HLA-B*08:01 |
|  | **HLA-B*35:01** |
|  | HLA-B*51:01 |
| 2 | TVQLGQVRSAKLATA | HLA-DRB1*03:01 | QLGQVRSAK | HLA-A*01:01 |
| HLA-DRB1*07:01 | **HLA-A*02:02** |
| **HLA-DRB1*15:01** | HLA-A*03:01 |
| HLA-DRB4*01:01 | HLA-B*51:01 |
| HLA-DRB5*01:01 |  |
| 3 | TAGIANADATFKVQY | HLA-DRB1*03:01 | IANADATFK | HLA-A*03:01 |
| HLA-DRB1*07:01 | HLA-A*11:01 |
| **HLA-DRB1*15:01** | **HLA-B*51:01** |
| HLA-DRB3*01:01 |  |
| HLA-DRB5*01:01 |  |
| 4 | NTTVLALQNSAAGSA | HLA-DRB1*03:01 | LALQNSAAG | HLA-A*02:02 |
| HLA-DRB1*07:01 | **HLA-B*35:01** |
| **HLA-DRB1*1501** | HLA-B*51:01 |
| HLA-DRB3*02:02 |  |
| HLA-DRB4*01:01 |  |
| 5 | GPNIIPFQARYYATG | HLA-DRB1*03:01 | NIIPFQARY | **HLA-A*01:01** |
| HLA-DRB1*07:01 | HLA-A*02:02 |
| **HLA-DRB1*1501** | HLA-A*03:01 |
|  | HLA-B*35:01 |
| **FimF** | 1 | MRTLQYLLGALFTLG | HLA-DRB1*03:01 | YLLGALFTL | **HLA-A*02:01** |
| HLA-DRB1*07:01 | HLA-A*03:01 |
| **HLA-DRB1*15:01** | HLA-A*24:02 |
| HLA-DRB4*01:01 | HLA-B*08:01 |
|  | HLA-B*35:01 |
|  | HLA-B*51:01 |
| 2 | PAALAADSTIAISGY | HLA-DRB1*03:01 | LAADSTIAI | HLA-A*02:01 |
| HLA-DRB1*07:01 | HLA-A*24:02 |
| **HLA-DRB1*15:01** | HLA-B*08:01 |
| HLA-DRB3*01:01 | HLA-B*35:01 |
|  | **HLA-B*51:01** |
| 3 | TSLLKLDAGTSAAAG | HLA-DRB1*03:01 | SLLKLDAGT | **HLA-A*02:01** |
| HLA-DRB1*07:01 | HLA-A*03:01 |
| **HLA-DRB1*15:01** | HLA-A*11:01 |
| HLA-DRB3*01:01 |  |
| HLA-DRB3*02:02 |  |
| 4 | QTNILNFYARLMATQ | HLA-DRB1*03:01 | NILNFYARL | **HLA-A*02:01** |
| HLA-DRB1*07:01 | HLA-A*03:01 |
| **HLA-DRB1*15:01** | HLA-A*24:02 |
| HLA-DRB3*02:02 | HLA-B*08:01 |
|  | HLA-B*35:01 |
|  | HLA-B*51:01 |
| 5 | PFRIVLSPCGTSVTA | HLA-DRB1*03:01 | SPCGTSVTA | HLA-A*02:01 |
| HLA-DRB1*07:01 | HLA-A*03:01 |
| **HLA-DRB1*15:01** | HLA-B*35:01 |
| HLA-DRB3*02:02 | **HLA-B*51:01** |
|  |  |
| **FimG** | 1 | MKWTHVGWLLAGLLT | HLA-DRB1*07:01 | KWTHVGWLL | HLA-A*02:01 |
| **HLA-DRB1*15:01** | **HLA-A*24:02** |
|  | HLA-B*08:01 |
|  | HLA-B*35:01 |
| 2 | GWLLAGLLTASASLR | HLA-DRB1*03:01 | WLLAGLLTA | **HLA-A*02:01** |
| HLA-DRB1*07:01 | HLA-A*03:01 |
| **HLA-DRB1*15:01** | HLA-A*11:01 |
| 3 | AGLLTASASLRAADV | HLA-DRB1*03:01 | SASLRAADV | HLA-A*02:01 |
| HLA-DRB1*07:01 | HLA-A*03:01 |
| **HLA-DRB1*15:01** | HLA-B*08:01 |
| HLA-DRB3*02:02 | **HLA-B*51:01** |
| HLA-DRB5*01:01 |  |
| 4 | LRAADVTLTVNGKVV | HLA-DRB1*07:01 | RAADVTLTV | HLA-A*02:01 |
| **HLA-DRB1*15:01** | HLA-A*03:01 |
|  | **HLA-B*51:01** |
| 5 | QGTIQAVINVTYTYA | HLA-DRB1*03:01 | AVINVTYTY | HLA-A*01:01 |
| HLA-DRB1*07:01 | **HLA-A*02:02** |
| **HLA-DRB1*15:01** | HLA-A*03:01 |
| HLA-DRB3*02:02 | HLA-A*11:01 |
|  | HLA-B*35:01 |
| **FimH** | 1 | KKIIPLFTTLLLLGW | HLA-DRB1*03:01 | IPLFTTLLL | HLA-A*02:01 |
| HLA-DRB1*07:01 | HLA-A*24:02 |
| **HLA-DRB1*15:01** | HLA-B*08:01 |
|  | HLA-B*35:01 |
|  | **HLA-B*51:01** |
| 2 | ITAGSLIAVLILHQT | HLA-DRB1*03:01 | AGSLIAVLI | HLA-A*02:02 |
| HLA-DRB1*07:01 | HLA-A*03:01 |
| **HLA-DRB1*15:01** | HLA-A*11:01 |
| HLA-DRB4*01:01 | HLA-A*24:02 |
|  | HLA-B*35:01 |
|  | **HLA-B*51:01** |
| 3 | SDSFQFIWNIYANND | HLA-DRB1*03:01 | DSFQFIWNI | HLA-A*02:02 |
| HLA-DRB1*07:01 | HLA-A*11:01 |
| **HLA-DRB1*15:01** | HLA-A*24:02 |
| HLA-DRB3*02:02 | **HLA-B*51:01** |
| 4 | QTNNYNSDSFQFIWN | **HLA-DRB1*15:01** | YNSDSFQFI | HLA-A*02:02 |
| HLA-DRB3*01:01 | HLA-A*24:02 |
|  | **HLA-B*51:01** |
| 5 | ARVIYDSRTDKPWPA | HLA-DRB1*03:01 | VIYDSRTDK | HLA-A*02:02 |
| HLA-DRB1*07:01 | **HLA-A*03:01** |
| **HLA-DRB1*15:01** | HLA-A*11:01 |
| *- HLA indicated with **bold** fonts were selected for docking analyses | | | | | |
